# Supplementary material
Source: PubMed Central journal article supplement (PMC3995082)
Supplement: Supp_Table1.pdf [file Supp_Table1.pdf]

## Supplementary Data

SUPPLEMENTARY TABLE S1. PRIMERS USED IN THIS STUDY

| <i>Gene</i>             | <i>Forward primer</i>           | <i>Reverse primer</i>      | <i>Expected size (bp)</i> |
|-------------------------|---------------------------------|----------------------------|---------------------------|
| GAPDH                   | GGT CGG AGT CAA CGG ATT TGG TCG | GCC AGC ATC GCC CCA CTT GA | 259                       |
| MUC1                    | TGC ATC AGG CTC AGC TTC A       | GAA ATG GCA CAT CAC TCA G  | 548                       |
| $\alpha_1$ -integrin    | GAA TGC AGC ACT CAA CTG GA      | GCC TCC TTT CTT GCT GTG TC | 287                       |
| $\alpha_2$ -integrin    | GGG CAT TGA AAA CAC TCG AT      | TCG GAT CCC AAG ATT TCT G  | 183                       |
| $\alpha_5$ -integrin    | CCG GGA CAC TAA GAA AAC CA      | CAC GTC CTC CTC CTT CTG AG | 205                       |
| $\alpha_6$ -integrin    | GGA GCC CCA CAG TAT TTT GA      | TTC CAT TTG CAG ATC CAT GA | 244                       |
| $\alpha_7$ -integrin    | ACC AAT ACC CTG ACC TGC TG      | CTA TAG CTG CTG GGG ACT GC | 202                       |
| $\alpha_8$ -integrin    | CAC ATT CTG GTG GAC TGT GG      | AAT CCC TTG TTG TTG CGT TC | 218                       |
| $\alpha_9$ -integrin    | CGG AAT CAT GTC TCC AAC CT      | TCT CTG CAC CAC CAG ATG AG | 197                       |
| $\alpha_{10}$ -integrin | GGT GAG AGC AGC AAA GAA CC      | TCC TCT CCA TCA TGG GAC TC | 168                       |
| $\alpha_{11}$ -integrin | GAG CCA CTA CGA GGT CAA GC      | GTG CTA TTG CCC CAG ATG TT | 228                       |
| $\alpha_v$ -integrin    | CAC CAG CAG TCA GAG ATG GA      | TGC CTT GCT GAA TGA ACT TG | 276                       |
| $\beta_1$ -integrin     | AGA AAG ACA CAT GCG CAC AG      | CCA GTG GGA CAC TCT GGA TT | 208                       |
| $\beta_3$ -integrin     | CGT CCA GGT CAC CTT TGA TT      | GTG GCA GAC ACA TTG ACC AC | 250                       |
| $\beta_5$ -integrin     | GTT CAC AAC GGA TGA TGT GC      | CAC TGC GAA GAT GAG GTT GA | 190                       |
